# Supplementary material for: A Next-Generation Sequencing Approach Uncovers Viral Transcripts Incorporated in Poxvirus Virions
Source: PubMed Central journal article supplement (PMC5691647; doi:10.3390/v9100296), 2017-10-13
Supplement: viruses-09-00296-s001.pdf [file viruses-09-00296-s001.pdf]

# Supplementary Materials

## A Next-Generation Sequencing Approach Uncovers Viral Transcripts Incorporated in Poxvirus Virions

Marica Grossegeesse <sup>1</sup>, Joerg Doellinger <sup>1,2</sup>, Berit Haldemann <sup>3</sup>, Lars Schaade <sup>4</sup> and Andreas Nitsche <sup>1\*</sup>

Robert Koch Institute, Seestr. 10, 13353 Berlin/Germany

<sup>1</sup> Centre for Biological Threats and Special Pathogens, Highly Pathogenic Viruses (ZBS 1); GrossegeesseM@rki.de

<sup>2</sup> Centre for Biological Threats and Special Pathogens, Proteomics and Spectroscopy (ZBS 6); DoellingerJ@rki.de

<sup>3</sup> Methodology and Research Infrastructure, Bioinformatics (MF 1); HaldemannB@rki.de

<sup>4</sup> Centre for Biological Threats and Special Pathogens (ZBS); SchaadeL@rki.de

\* Correspondence: NitscheA@rki.de; phone: +49 (0)30 18754 2313

### Supplementary Figures:

**Figure S1.** Sample preparation for the analysis of transcript incorporation in CPXV particles.

**Figure S2.** Analysis of virion purity and integrity by electron microscopy.

### Supplementary Tables:

**Table S1.** Nucleic acids used for qPCR.

**Table S2.** Reaction mixture for CCHF qPCR.

**Table S3.** Thermal profile CCHF qPCR.

**Table S4.** Reaction mixture for OPV qPCR.

**Table S5.** Thermal profile OPV qPCR.

**Table S6.** Overview of reads mapping to virus and host genome.

**Table S7.** Viral and host transcripts identified in CPXV ranked by normalized read count.

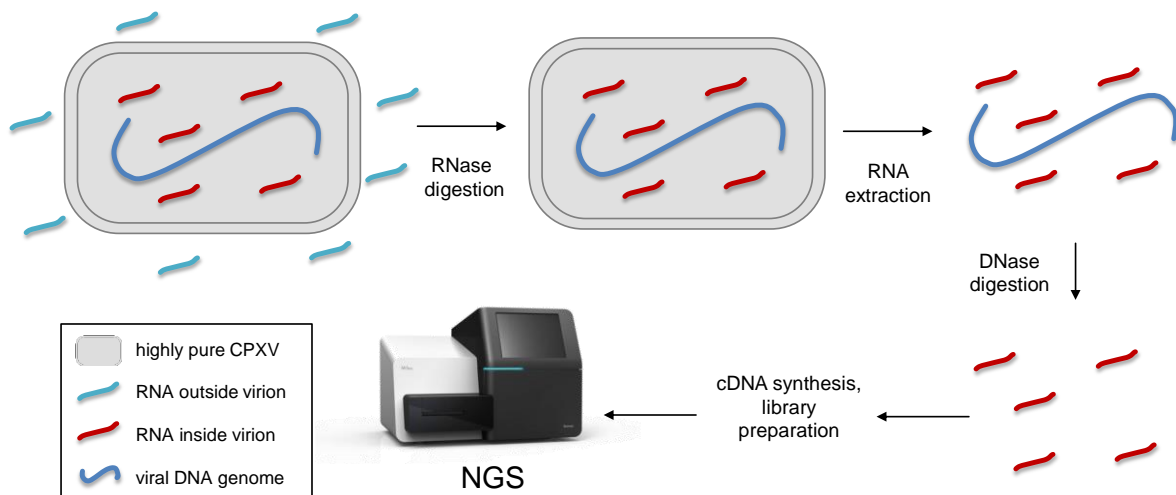

**Figure S1.** Sample preparation for the analysis of transcript incorporation in CPXV particles. RNA outside of highly pure CPXV particles was digested with RNase prior to RNA extraction. Viral DNA was digested and the leftover RNA analyzed with next-generation sequencing (NGS).

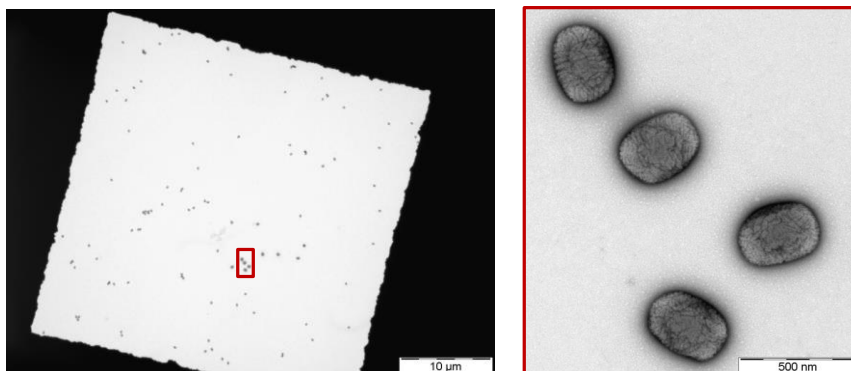

**Figure S2.** Analysis of virion purity and integrity by electron microscopy. Exemplary pictures of CsCl purified CPXV BR stock (HEp-2-adapted). No protein clouds are detectable outside of virions and particles appear fully intact.

**Table S1. Nucleic acids used for qPCR.**

| Name        | Sequence (5'> 3')                            | Application                     |
|-------------|----------------------------------------------|---------------------------------|
| P4A F       | TAA TAC TTC gAT TgC TCA TCC Agg              | Poxvirus reference sequence [1] |
| P4A R       | ACT TCT CAC AAA Tgg ATT TgA AAA TC           |                                 |
| P4A probe   | Fam-TCC TTT ACg TgA TAA ATC AT-MGB           |                                 |
| CCforSE01   | CAA ggg gTA CCA AgA AAA TgA AgA AGG C        | Detection of CCHF RNA [2]       |
| CCrevSE02   | gCC ACA ggg ATT gTT CCA AAg CAg AC           |                                 |
| CCprobeSE01 | FAM-TgT CAA CAC AgC Agg gTg CAT gTA gAT-BHQ1 |                                 |
| CCprobeSE03 | FAM-TgT AAg CAC ggC Agg gTg CAT gTA AAT-BHQ1 |                                 |
| CCprobeSE04 | FAM-ATC TAT ATg CAC CCC gCT gTg TTA ACA-BHQ1 |                                 |
| CCprobeSE0A | FAM-ACT CCA ATg AAg Tgg ggg AAg AAg CT-BHQ1  |                                 |

**Table S2. Reaction mixture for CCHF qPCR.**

| Reagent                      | Volume per reaction [μl] |
|------------------------------|--------------------------|
| H <sub>2</sub> O (PCR-grade) | 3.5                      |
| RT buffer                    | 2.5                      |
| Enhancer                     | 1                        |
| CCforSE01                    | 1.50                     |
| CCrevSE02                    | 1.50                     |
| CCprobeSE01                  | 0.25                     |
| CCprobeSE03                  | 0.25                     |
| CCprobeSE04                  | 0.25                     |
| CCprobeSE0A                  | 0.25                     |
| Enzyme Mix                   | 1.00                     |

**Table S3. Thermal profile CCHF qPCR.**

| Temperature [°C] | Time [s] | Cycle |
|------------------|----------|-------|
| 45               | 900      | 1 x   |
| 95               | 600      | 1 x   |
| 94               | 20       | 45 x  |
| 59               | 30       |       |

**Table S4. Reaction mixture for OPV qPCR.**

| Reagent                      | Volume per reaction [μl] |
|------------------------------|--------------------------|
| H <sub>2</sub> O (PCR-grade) | 14.15                    |
| 10 x PCR buffer              | 2.5                      |
| MgCl <sub>2</sub> (50 mM)    | 2                        |
| dNTPs (2.5mM)                | 2                        |
| F primer (10 μM)             | 0.75                     |
| R primer (10 μM)             | 0.75                     |
| Probe (10 μM)                | 0.25                     |
| Platinum Taq (5 U/μl)        | 0.1                      |

**Table S5. Thermal profile OPV qPCR.**

| Temperature [°C] | Time [s] | Cycle |
|------------------|----------|-------|
| 95               | 600      | 1 x   |
| 95               | 10       | 45 x  |
| 60               | 35       |       |

- Schroeder, K.; Nitsche, A. Multicolour, multiplex real-time pcr assay for the detection of human-pathogenic poxviruses. *Mol Cell Probes* **2010**, *24*, 110-113.
- Wolfel, R.; Paweska, J.T.; Petersen, N.; Grobbelaar, A.A.; Leman, P.A.; Hewson, R.; Georges-Courbot, M.C.; Papa, A.; Gunther, S.; Drosten, C. Virus detection and monitoring of viral load in crimean-congo hemorrhagic fever virus patients. *Emerg Infect Dis* **2007**, *13*, 1097-1100.

**Table S6. Overview of reads mapping to virus and host genome.**

| Sample       | Protocol | Viral reads | Host reads | Mean genome coverage <sup>1</sup> | Max. coverage <sup>2</sup> | Multiple mapping <sup>3</sup> |
|--------------|----------|-------------|------------|-----------------------------------|----------------------------|-------------------------------|
| CPXV BR,     | I        | 3.3E+05     | 6.4E+05    | 201.4                             | 25,172                     | 4                             |
| HEp-2        | II       | 1.0E+05     | 1.1E+06    | 49.9                              | 7,134                      | 4                             |
| adapted      | III      | 2.6E+05     | 5.7E+05    | 141.6                             | 17,081                     | 1                             |
| CPXV BR,     | I        | 8.4E+05     | 4.7E+04    | 489.3                             | 118,673                    | 0                             |
| Rat-2        | II       | 6.7E+05     | 3.6E+05    | 578.6                             | 114,124                    | 1                             |
| adapted      | III      | 6.3E+05     | 1.4E+05    | 504.7                             | 106,390                    | 0                             |
| Control      | I        | 7.1E+03     | 4.1E+05    | 3.6                               | 188                        | 2                             |
| HEp-2        | II       | 1.5E+03     | 2.6E+05    | 0.6                               | 51                         | 0                             |
| adapted      | III      | 6.5E+03     | 2.8E+05    | 2.7                               | 121                        | 9                             |
| Control Rat- | I        | 5.5E+02     | 9.2E+03    | 0.4                               | 51                         | 0                             |
| 2 adapted    | II       | 8.3E+02     | 3.4E+04    | 0.6                               | 118                        | 1                             |
|              | III      | 5.4E+02     | 2.4E+04    | 0.4                               | 79                         | 0                             |

I: RNase digestion, II: no RNase digestion, III: protease and RNase digestion

<sup>1</sup>viral genome coverage <sup>2</sup>max. coverage viral genome <sup>3</sup>reads mapping to virus and host genome

**Table S7. Viral and host transcripts identified in CPXV ranked by normalized read count.**

| Rank | HEp_I                | HEp_II      | HEp_III              | Rat_I    | Rat_II               | Rat_III              |
|------|----------------------|-------------|----------------------|----------|----------------------|----------------------|
| 1    | D5L/I1R <sup>1</sup> | 18S rRNA    | D5L/I1R              | D5L/I1R  | D5L/I1R              | D5L/I1R              |
| 2    | 18S rRNA             | 28S rRNA    | 18S rRNA             | B8R      | mt 12S rRNA          | B8R                  |
| 3    | 28S rRNA             | mt 12S rRNA | 28S rRNA             | B13R     | 18S rRNA             | 18S rRNA             |
| 4    | B8R                  | mt 16S rRNA | mt 16S rRNA          | C14L     | B8R                  | B13R                 |
| 5    | mt 16S rRNA          | D5L/I1R     | B8R                  | C10L     | mt 16S rRNA          | mt 12S rRNA          |
| 6    | C10L                 | C10L        | mt 12S rRNA          | J5R      | B13R                 | C10L                 |
| 7    | mt 12S rRNA          | B8R         | C10L                 | D1L/I5R  | 002/228 <sup>1</sup> | C14L                 |
| 8    | D10L                 |             | D10L                 | 18S rRNA | C10L                 | mt 16S rRNA          |
| 9    | F3L                  |             | 002/228 <sup>1</sup> | M1L      | J5R                  | J5R                  |
| 10   | D1L/I5R              |             | F3L                  | A36R     | C14L                 | D1L/I5R              |
| 11   | 002/228 <sup>1</sup> |             | C8L                  |          | D1L/I5R              | 002/228 <sup>1</sup> |
| 12   | C8L                  |             | D1L/I5R              |          | ND1                  | D10L                 |
| 13   | B13R                 |             | C14L                 |          | 28S rRNA             | M1L                  |
| 14   | C14L                 |             | B13R                 |          | COX3                 | ND1                  |
| 15   | J5R                  |             | C6L                  |          | D10L                 | A36R                 |
| 16   | F4L                  |             | F4L                  |          | ATP6                 | C8L                  |
| 17   | C6L                  |             | D6L                  |          | COX1                 | COX3                 |
| 18   | D6L                  |             | MIR6087              |          | B2R                  | F3L                  |
| 19   | A36R                 |             | J5R                  |          | M1L                  | P2L                  |
| 20   | A34R                 |             | A36R                 |          | F3L                  |                      |
| 21   | MIR6087              |             | A34R                 |          | C8L                  |                      |
| 22   | P2L                  |             | P2L                  |          | A36R                 |                      |
| 23   | A47R                 |             | C13L                 |          |                      |                      |
| 24   | B12R                 |             | M1L                  |          |                      |                      |
| 25   |                      |             | B10R                 |          |                      |                      |
| 26   |                      |             | A47R                 |          |                      |                      |
| 27   |                      |             | D8L                  |          |                      |                      |

I: RNase digestion, II: no RNase digestion, III: protease and RNase digestion

Redundant genes were summarized. white: viral; grey: host; red: ribosomal RNA (mt = mitochondrial)

Gene names acc. CPXV BR
